# Supplementary material
Source: PubMed Central journal article supplement (PMC3182348)
Supplement: mt2011113x1.pdf [file mt2011113x1.pdf]

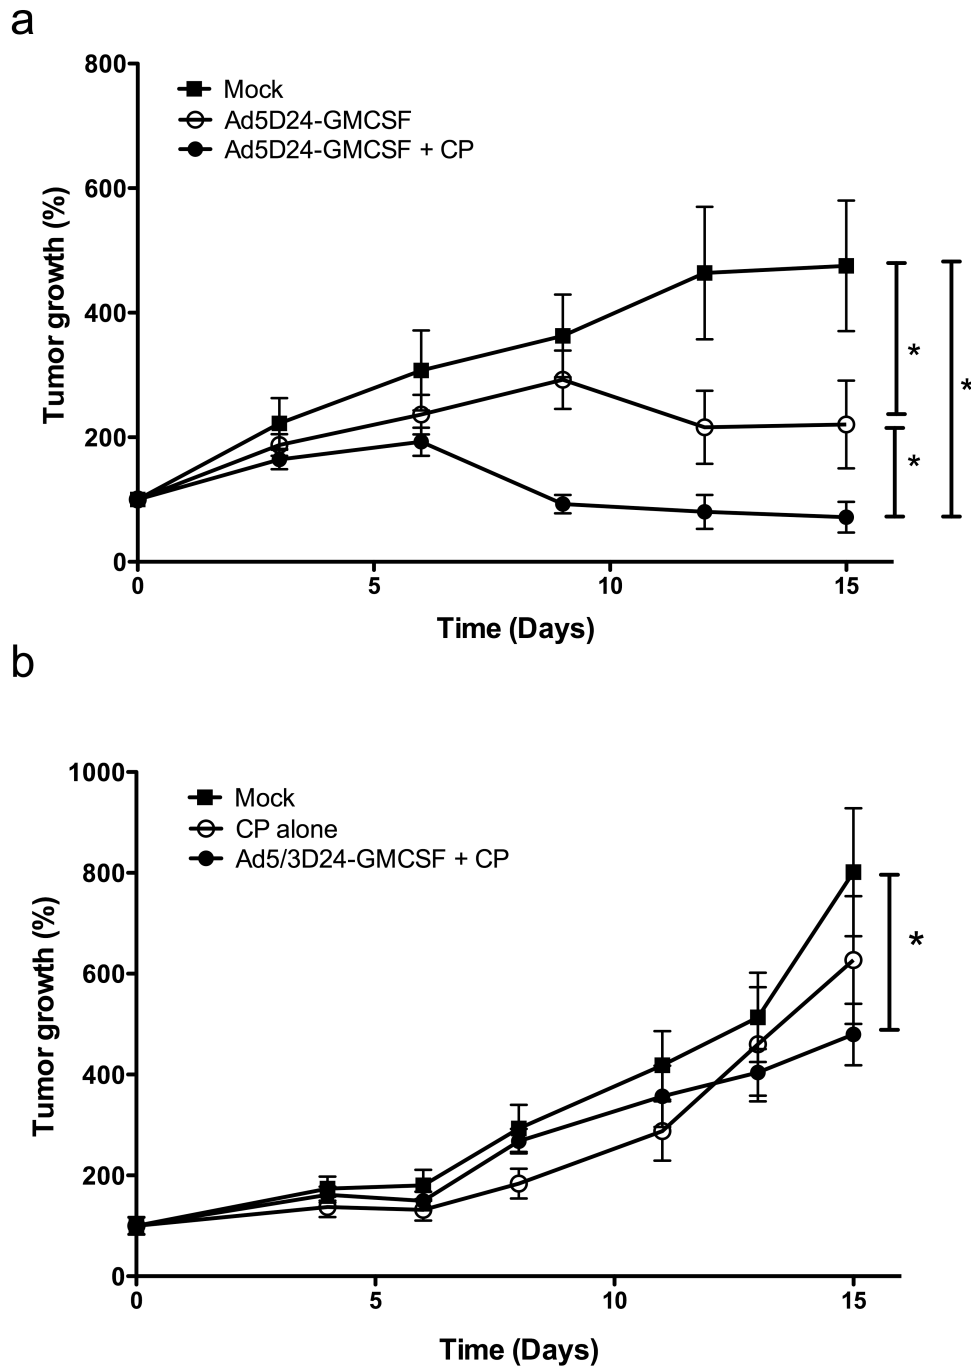

**Figure S1.** Metronomic administration of low-dose cyclophosphamide enhances oncolytic adenovirus efficacy in immunocompetent syngeneic syrian hamsters. (A) Three groups of Syrian hamsters, semi-permissive for human adenovirus replication, were treated with Ad5D24-GMCSF (white circle), Ad5D24-GMCSF in combination with low dose cyclophosphamide (CP) (black circle), untreated animals were used as control (black square). (B) Three groups of syrian hamsters were treated with low dose cyclophosphamide only (white circle), in combination with Ad5/3D24-GMCSF (CP) (black circle), untreated animals were used as control (black square).
