# Supplementary material
Source: PubMed Central journal article supplement (PMC3182348)
Supplement: mt2011113x2.pdf [file mt2011113x2.pdf]

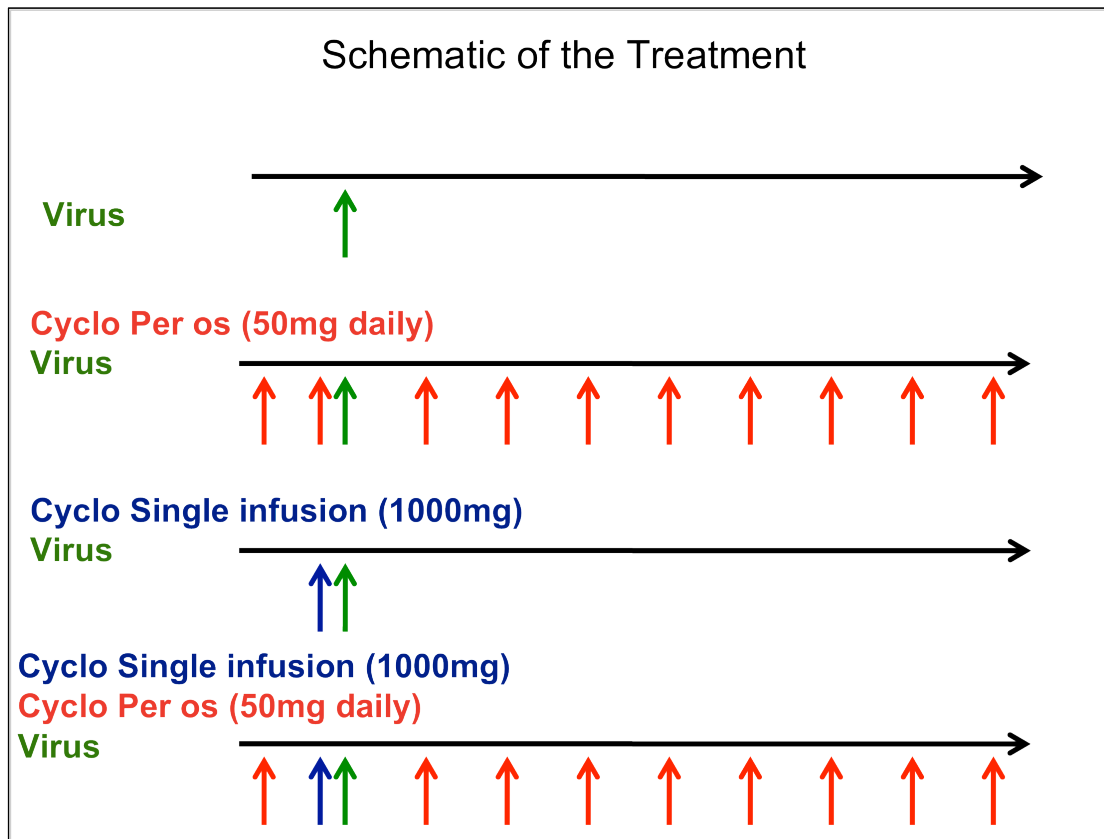

**Figure S2. Schematic representation of the treatment schedule.** The first cohort of patients was treated only with oncolytic adenovirus, the second cohort of patient was treated with low dose of cyclophosphamide (CP) via oral administration daily, the third cohort of patients was treated with a single administration of CP intravenously followed by the oncolytic adenovirus treatment. The fourth cohort of patients was treated with a single intravenous administration together with per os administration of CP.
