# Supplementary material
Source: PubMed Central journal article supplement (PMC3182348)
Supplement: mt2011113x3.pdf [file mt2011113x3.pdf]

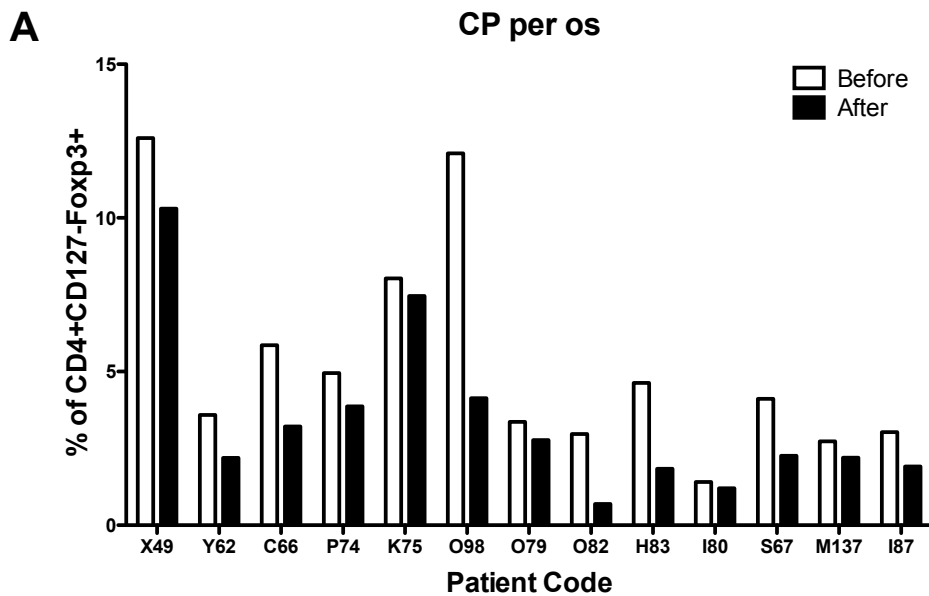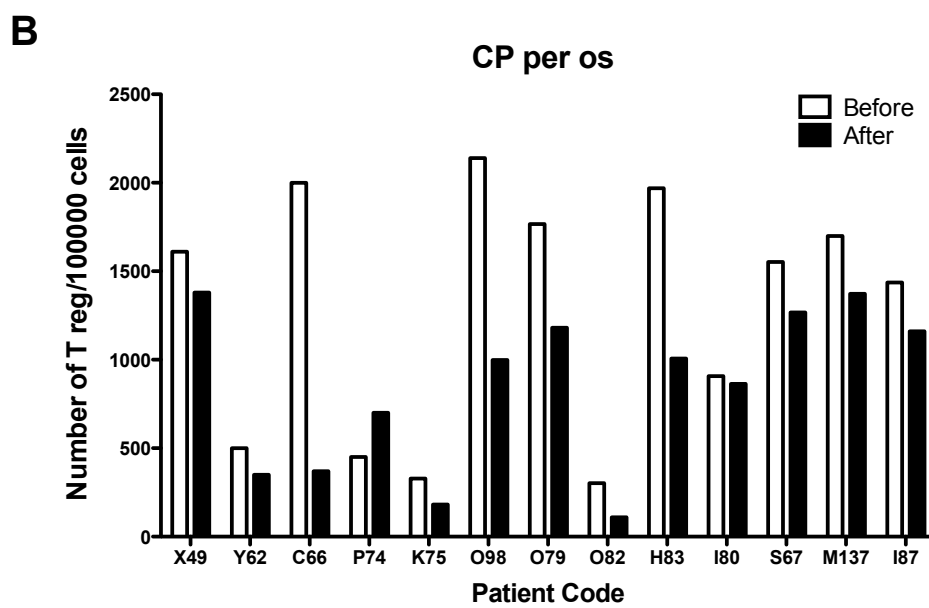

**Figure S3.** PBMCs from patients treated with oncolytic adenovirus in combination with low dose CP per os were collected before and after the treatment and stained for CD4, CD127 and Foxp3. (A) percentage of regulatory T cells in the total CD4+. (B) Total number of regulatory T cells.
