# Supplementary material
Source: PubMed Central journal article supplement (PMC3182348)
Supplement: mt2011113x4.pdf [file mt2011113x4.pdf]

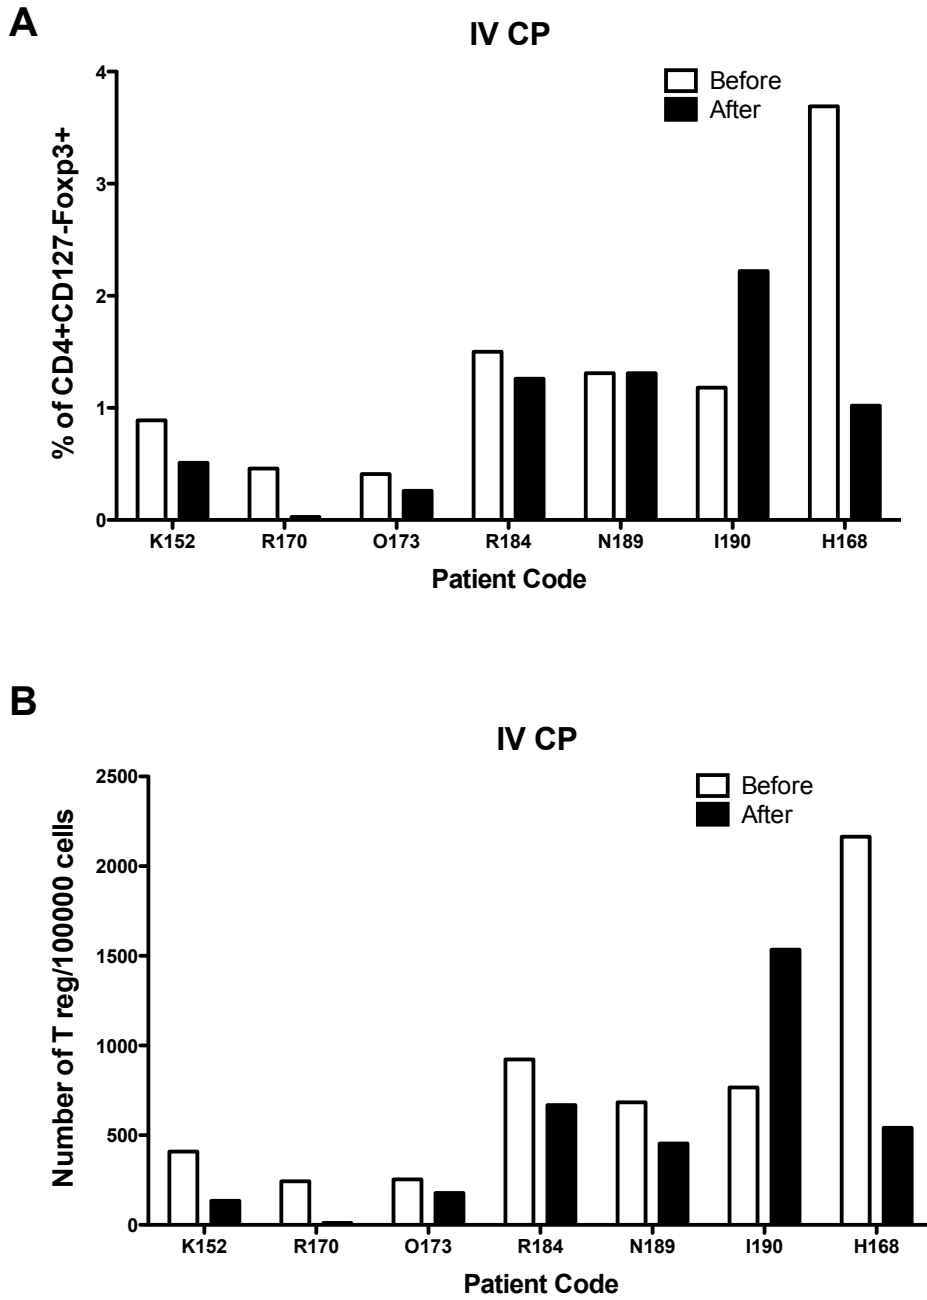

**Figure S4.** PBMCs from patients treated with oncolytic adenovirus in combination with intravenous CP were collected before and after the treatment and stained for CD4, CD127 and Foxp3. (A) percentage of regulatory T cells in the total CD4+. (B) Total number of regulatory T cells.
