# Supplementary material
Source: PubMed Central journal article supplement (PMC3182348)
Supplement: mt2011113x5.pdf [file mt2011113x5.pdf]

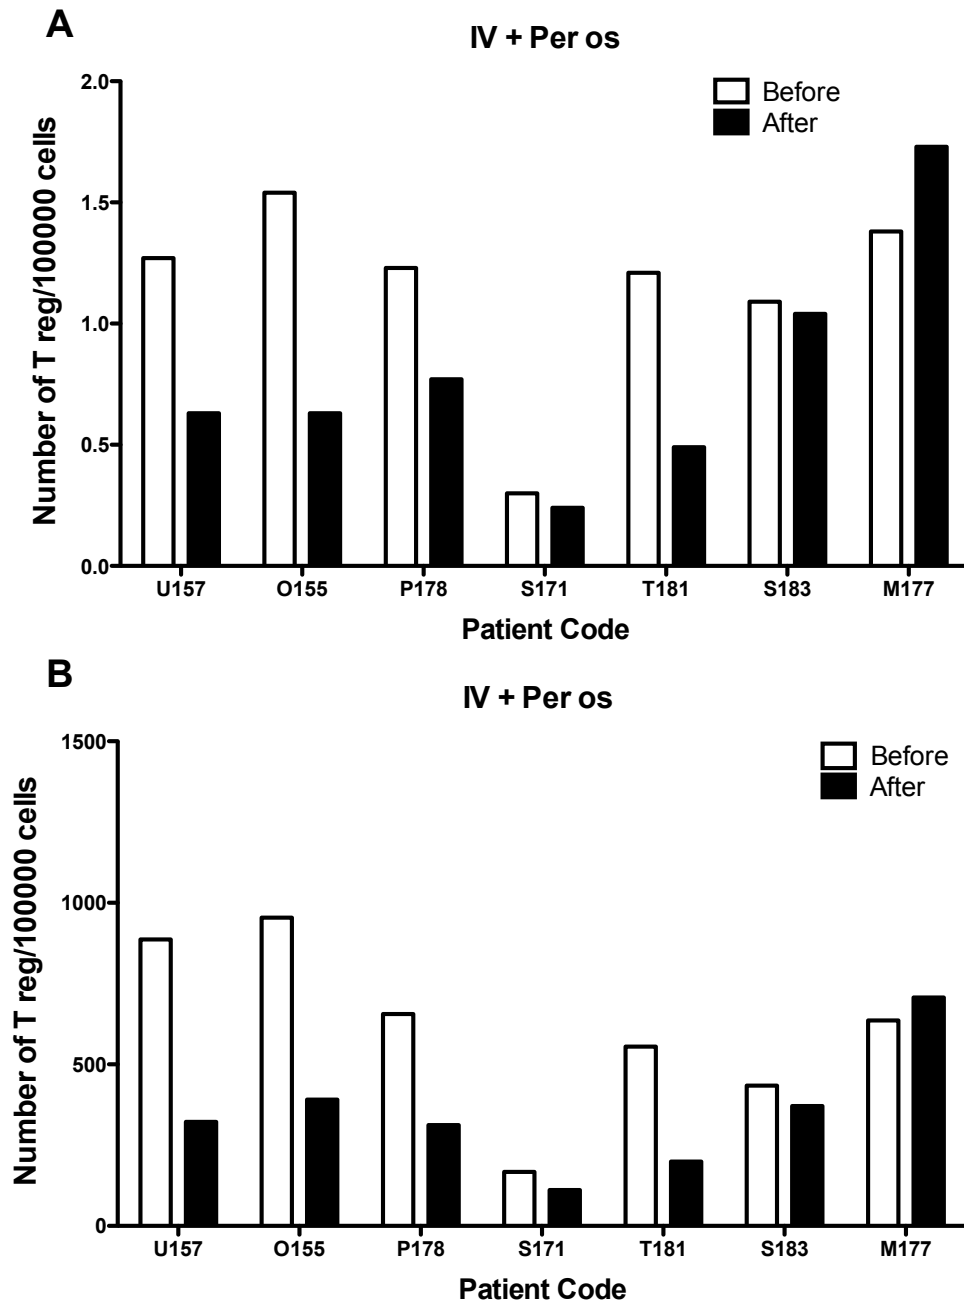

**Figure S5.** PBMCs from patients treated with the combination of oncolytic adenovirus, intravenous CP and low dose per os CP were collected before and after the treatment and stained for CD4, CD127 and Foxp3. (A) percentage of regulatory T cells in the total CD4+. (B) Total number of regulatory T cells.
