# Supplementary material
Source: PubMed Central journal article supplement (PMC3182348)
Supplement: mt2011113x6.pdf [file mt2011113x6.pdf]

| ID                                                        | Age | Sex | Diagnosis           | Prior Therapies for Metastatic Disease        | WHO |
|-----------------------------------------------------------|-----|-----|---------------------|-----------------------------------------------|-----|
| <b>No Cyclophosphamide treatment</b>                      |     |     |                     |                                               |     |
| S100                                                      | 63  | F   | Leiomyosarcoma      | 4 lines of chemotherapy + radiotherapy        | 2   |
| C58                                                       | 54  | M   | Colon ca            | 3 lines of chemotherapy                       | 2   |
| X122                                                      | 77  | F   | Uterus ca           | 3 lines of chemotherapy                       | 1   |
| C95                                                       | 63  | M   | Rectum ca           | 4 lines of chemotherapy                       | 1   |
| H96                                                       | 64  | M   | Pancreatic ca       | 4 lines of chemotherapy                       | 2   |
| O129                                                      | 48  | F   | Ovarian ca          | 4 lines of chemotherapy                       | 0   |
| K117                                                      | 65  | F   | Lung adenoca        | 5 lines of chemotherapy                       |     |
| O113                                                      | 67  | F   | Ovarian ca          | 5 lines of chemotherapy + radiotherapy        | 1   |
| <b>Cyclophosphamide <i>per os</i></b>                     |     |     |                     |                                               |     |
| X49                                                       | 60  | F   | Cervical ca         | 8 lines of chemotherapy                       | 3   |
| I78                                                       | 60  | F   | Choroideal melanoma | 3 lines of chemotherapy                       | 0   |
| I52                                                       | 58  | F   | Melanoma            | 3 lines of chemotherapy + radiotherapy        | 2   |
| O88                                                       | 59  | F   | Ovarian ca          | 8 lines of chemotherapy                       | 3   |
| R73                                                       | 58  | F   | Breast ca           | 7 lines of chemotherapy                       | 1   |
| Y62                                                       | 55  | M   | Cholangio ca        | 1 line of chemotherapy                        | 2   |
| C66                                                       | 63  | F   | Colon ca            | 2 lines of chemotherapy                       | 0   |
| S67                                                       | 55  | M   | Chondrosarcoma      | 2 lines of chemotherapy                       | 1   |
| I80                                                       | 38  | F   | Choroideal melanoma | 2 lines of chemotherapy + radiotherapy        | 1   |
| I87                                                       | 64  | M   | Melanoma            | 2 lines of chemotherapy + radiotherapy        | 1   |
| K75                                                       | 64  | M   | Lung adenoca        | 2 lines of chemotherapy                       | 1   |
| O79                                                       | 70  | F   | Ovarian ca          | 7 lines of chemotherapy                       | 1   |
| O82                                                       | 56  | F   | Ovarian ca          | 7 lines of chemotherapy                       | 1   |
| I98                                                       | 38  | F   | Choroideal melanoma | 3 lines of chemotherapy                       | 1   |
| P74                                                       | 55  | M   | Prostate ca         | 3 lines of chemotherapy                       | 3   |
| K117                                                      | 65  | F   | Lung adenoca        | 5 lines of chemotherapy                       | 1   |
| M126                                                      | 71  | M   | Mesothelioma        | 1 line of chemotherapy                        | 1   |
| O130                                                      | 68  | F   | Ovarian ca          | 5 lines of chemotherapy                       | 1   |
| S135                                                      | 47  | F   | Liposarcoma         | 2 lines of chemotherapy                       | 1   |
| C143                                                      | 69  | M   | Colon ca            | 4 lines of chemotherapy                       | 2   |
| C151                                                      | 47  | F   | Appendix ca         | 4 lines of chemotherapy                       | 3   |
| <b>Cyclophosphamide single intravenous administration</b> |     |     |                     |                                               |     |
| K152                                                      | 37  | M   | Lung adenoca        | 7 lines of chemotherapy                       | 2   |
| R170                                                      | 64  | M   | Breast ca           | 7 lines of chemotherapy                       | 2   |
| O173                                                      | 62  | F   | Ovarian ca          | 10 lines of chemotherapy                      | 2   |
| R184                                                      | 69  | F   | Breast ca           | 6 lines of chemotherapy                       | 1   |
| N189                                                      | 56  | M   | Parotid ca          | 3 lines of chemotherapy                       | 1   |
| I190                                                      | 45  | F   | Choroideal melanoma | 1 line of chemotherapy + surgery              | 0   |
| H168                                                      | 71  | F   | Pancreatic ca       | 3 lines of chemotherapy                       | 1   |
| <b>Cyclophosphamide IV + <i>per os</i></b>                |     |     |                     |                                               |     |
| U157                                                      | 9   | M   | Wilms tumor         | 7 lines of chemotherapy                       | 1   |
| O155                                                      | 54  | F   | Ovarian ca          | 3 lines of chemotherapy                       | 1   |
| P178                                                      | 65  | M   | Prostate ca         | 4 lines of chemotherapy + surgery             | 1   |
| S171                                                      | 67  | M   | Sarcoma (MFH)       | Surgery + radiation + chemotherapy            | 0   |
| T181                                                      | 60  | M   | Thyroid ca          | Surgery + radiation + radioiodide             | 1   |
| S183                                                      | 40  | F   | Liposarcoma         | 7 lines of chemotherapy + Surgery + radiation | 1   |
| M177                                                      | 73  | F   | Mesothelioma        | 4 lines of chemotherapy                       | 1   |

**Table S1. Tumor type treated and summary of responses to treatment.** Radiological imaging was performed with computer tomography and classified according to RECIST1.1. Partial response (PR) indicates more than 30% decrease, while progressive disease (PD) is more than 20% increase in sum of tumor diameters. SD indicates stable disease. In addition, MR was used to

indicate minor response (10-29% reduction of tumor diameters). Ovarian cancer patients O88 and O155 had peritoneal tumors which could not be classified according to RECIST criteria and thus responses are estimates. With regard to tumor markers measured from blood, MR indicates 12-29% decrease in marker, while PR is more than 30% decrease. PD is more than 20% increase while SD indicates stabilization (no progression or response). Best response indicated for each patient. Blanks indicate data not available. Choi response indicates a decrease in tumor density..
