# Supplementary material
Source: PubMed Central journal article supplement (PMC3182348)
Supplement: mt2011113x7.pdf [file mt2011113x7.pdf]

| Toxicity Grade                 | No Cyclo (7 pts) |   |   |   | Cyclo Per os (22 pts) |    |                |   | Cyclo IV (7 pts) |   |   |   | Cyclo IV + Per os (7 pts) |   |   |   |
|--------------------------------|------------------|---|---|---|-----------------------|----|----------------|---|------------------|---|---|---|---------------------------|---|---|---|
|                                | 1                | 2 | 3 | 4 | 1                     | 2  | 3              | 4 | 1                | 2 | 3 | 4 | 1                         | 2 | 3 | 4 |
| <b>General</b>                 |                  |   |   |   |                       |    |                |   |                  |   |   |   |                           |   |   |   |
| Chills                         | 2                | 0 | 0 | 0 | 3                     | 2  | 0              | 0 | 2                | 0 | 0 | 0 | 1                         | 0 | 0 | 0 |
| Dizziness                      | 0                | 0 | 0 | 0 | 1                     | 0  | 0              | 0 | 0                | 0 | 0 | 0 | 0                         | 0 | 0 | 0 |
| Dyspnea                        | 0                | 0 | 0 | 0 | 0                     | 2  | 0              | 0 | 0                | 1 | 0 | 0 | 0                         | 0 | 0 | 0 |
| Fatigue                        | 1                | 4 | 0 | 0 | 4                     | 9  | 0              | 0 | 2                | 2 | 0 | 0 | 0                         | 1 | 0 | 0 |
| Fever                          | 3                | 2 | 0 | 0 | 11                    | 6  | 0              | 0 | 3                | 2 | 0 | 0 | 2                         | 1 | 0 | 0 |
| <b>Metabolic or laboratory</b> |                  |   |   |   |                       |    |                |   |                  |   |   |   |                           |   |   |   |
| ALT increased                  | 0                | 0 | 0 | 0 | 6                     | 0  | 0              | 0 | 0                | 0 | 0 | 0 | 0                         | 0 | 0 | 0 |
| AST increased                  | 3                | 0 | 0 | 0 | 4                     | 3  | 1              | 0 | 0                | 0 | 0 | 0 | 0                         | 0 | 0 | 0 |
| Hyperbilirubinemia             | 2                | 0 | 0 | 0 | 1                     | 0  | 0              | 0 | 0                | 0 | 0 | 0 | 0                         | 0 | 0 | 0 |
| Hyperkalemia                   | 0                | 0 | 0 | 0 | 1                     | 1* | 0              | 0 | 0                | 0 | 0 | 0 | 0                         | 0 | 0 | 0 |
| Hypokalemia                    | 0                | 0 | 0 | 0 | 5                     | 0  | 0              | 0 | 2                | 0 | 0 | 0 | 1                         | 0 | 0 | 0 |
| Hyponatremia                   | 1                | 0 | 0 | 0 | 7                     | 0  | 2+1*           | 0 | 2                | 0 | 0 | 0 | 2                         | 0 | 0 | 0 |
| <b>Cardiovascular</b>          |                  |   |   |   |                       |    |                |   |                  |   |   |   |                           |   |   |   |
| Hypotension                    | 0                | 1 | 0 | 0 | 2                     | 0  | 0              | 0 | 1                | 0 | 0 | 0 | 0                         | 0 | 0 | 0 |
| <b>Haematological</b>          |                  |   |   |   |                       |    |                |   |                  |   |   |   |                           |   |   |   |
| Hemoglobin decreased           | 0                | 1 | 0 | 0 | 5                     | 2  | 0              | 0 | 1                | 0 | 0 | 0 | 0                         | 0 | 0 | 0 |
| Leukocytopenia                 | 0                | 1 | 0 | 0 | 0                     | 0  | 0              | 0 | 0                | 0 | 0 | 0 | 0                         | 0 | 0 | 0 |
| Thrombocytopenia               | 3                | 0 | 0 | 0 | 0                     | 0  | 0              | 0 | 2                | 0 | 0 | 0 | 0                         | 0 | 0 | 0 |
| <b>Gastrointestinal</b>        |                  |   |   |   |                       |    |                |   |                  |   |   |   |                           |   |   |   |
| Anorexia                       | 0                | 1 | 0 | 0 | 1                     | 1  | 0              | 0 | 2                | 0 | 0 | 0 | 0                         | 0 | 0 | 0 |
| Constipation                   | 0                | 0 | 0 | 0 | 1                     | 0  | 1 <sup>§</sup> | 0 | 0                | 0 | 0 | 0 | 0                         | 0 | 0 | 0 |
| Nausea                         | 1                | 0 | 0 | 0 | 7                     | 0  | 0              | 0 | 1                | 2 | 0 | 0 | 2                         | 0 | 0 | 0 |
| Vomiting                       | 1                | 0 | 0 | 0 | 3                     | 1  | 0              | 0 | 0                | 0 | 0 | 0 | 2                         | 0 | 0 | 0 |
| <b>Pain</b>                    |                  |   |   |   |                       |    |                |   |                  |   |   |   |                           |   |   |   |
| Injection site                 | 0                | 0 | 0 | 0 | 1                     | 1  | 0              | 0 | 2                | 0 | 0 | 0 | 1                         | 2 | 0 | 0 |
| Abdominal                      | 1                | 2 | 0 | 0 | 2                     | 1  | 1 <sup>§</sup> | 0 | 1                | 0 | 0 | 0 | 1                         | 1 | 0 | 0 |
| Back                           | 0                | 1 | 0 | 0 | 2                     | 0  | 0              | 0 | 0                | 0 | 0 | 0 | 0                         | 0 | 0 | 0 |
| Extremity                      | 0                | 0 | 0 | 0 | 0                     | 1  | 0              | 0 | 0                | 0 | 0 | 0 | 0                         | 0 | 0 | 0 |
| Muscular                       | 0                | 0 | 0 | 0 | 0                     | 2  | 0              | 0 | 0                | 0 | 0 | 0 | 0                         | 0 | 0 | 0 |
| Others                         | 2                | 2 | 0 | 0 | 6                     | 5  | 0              | 0 | 3                | 1 | 0 | 0 | 1                         | 0 | 0 | 0 |

**Table S2. Summary of adverse effects.** Physical condition, laboratory data and medical history were assessed at each visit and scored according to CTCEA 3.0. \*day 31 after treatment; § Ovarian cancer patient O88.
